# Supplementary material for: Newcastle Disease Genotype VII Prevalence in Poultry and Wild Birds in Egypt
Source: MDPI journal article supplement (doi:10.3390/v14102244), 2022-10-13
Supplement: s1 [file s1]

## Supplementary material

**Supplementary Table S1.** The genetic relatedness among the NDV strains. Phylogenetic analysis of a total of 130 NDV strains, including our five isolates (in bold), was performed based on the full F gene coding region. The analysis included 125 representative sequences that belong to different genotyping groups. Representative datasets were created by an international consortium of NDV experts for the needs of objective classification of NDV isolates.

|                                                             | NDV/Chicken/Egypt/ALEX/ZU-<br>NM99/2019 | NDV/Chicken/Egypt/ALEX/ZU-<br>NM97/2019 | NDV/Chicken/Egypt/NOR/ZU-<br>NM76/2019 | NDV/Black-crowned<br>night heron/Egypt/POR/ZU-NM85/2019 | NDV/Duck/Egypt/DAK/ZU-<br>NM09/2019 |
|-------------------------------------------------------------|-----------------------------------------|-----------------------------------------|----------------------------------------|---------------------------------------------------------|-------------------------------------|
| <b>NDV/Chicken/Egypt/ALEX/ZU-NM99/2019</b>                  |                                         | 98.014                                  | 100                                    | 100                                                     | 98.014                              |
| <b>NDV/Chicken/Egypt/ALEX/ZU-NM97/2019</b>                  | 98.014                                  |                                         | 98.014                                 | 98.014                                                  | 100                                 |
| <b>NDV/Chicken/Egypt/NOR/ZU-NM76/2019</b>                   | 100                                     | 98.014                                  |                                        | 100                                                     | 98.014                              |
| <b>NDV/Black-crowned night heron/Egypt/POR/ZU-NM85/2019</b> | 100                                     | 98.014                                  | 100                                    |                                                         | 98.014                              |
| <b>NDV/Duck/Egypt/DAK/ZU-NM09/2019</b>                      | 98.014                                  | 100                                     | 98.014                                 | 98.014                                                  |                                     |
| XIV.2_XIV_b_HF969187_chicken_Nigeria_NIE08_453_2008         | 86.883                                  | 87.425                                  | 86.883                                 | 86.883                                                  | 87.425                              |
| XIV.2_XIV_b_HF969210_chicken_Nigeria_NIE10_139_2011         | 86.763                                  | 87.365                                  | 86.763                                 | 86.763                                                  | 87.365                              |
| XIV.2_XIV_b_KY171990_chicken_Nigeria_KD_TW_03T_N45_720_2009 | 86.883                                  | 87.485                                  | 86.883                                 | 86.883                                                  | 87.485                              |
| XIV.1_XIV_a_JN872165_chicken_Niger_VIR_1377_7_2006          | 87.304                                  | 87.545                                  | 87.304                                 | 87.304                                                  | 87.545                              |
| XIV.1_XIV_a_HF969205_turkey_Nigeria_NIE09_2071_2009         | 87.064                                  | 87.485                                  | 87.064                                 | 87.064                                                  | 87.485                              |
| XIV.1_XIV_a_JQ039386_chicken_Nigeria_VRD08_36_2008          | 87.545                                  | 87.906                                  | 87.545                                 | 87.545                                                  | 87.906                              |
| XVII_XVII_b_HF969194_chicken_Nigeria_NIE08_2199_2009        | 87.665                                  | 87.906                                  | 87.665                                 | 87.665                                                  | 87.906                              |
| XVII_XVII_a_HF969176_chicken_Nigeria_NIE10_310_2011         | 87.786                                  | 87.605                                  | 87.786                                 | 87.786                                                  | 87.605                              |
| XVII_XVII_a_HF969191_chicken_Nigeria_NIE08_2042_2009        | 87.786                                  | 87.365                                  | 87.786                                 | 87.786                                                  | 87.365                              |
| XII.2_XII_b_MF278927_goose_China_FS_SS_292_2013             | 88.207                                  | 88.267                                  | 88.207                                 | 88.207                                                  | 88.267                              |
| XII.2_XII_b_JN627504_goose_China_GD_12_2011                 | 88.267                                  | 88.327                                  | 88.267                                 | 88.267                                                  | 88.327                              |
| XII.2_XII_b_JN627507_goose_China_GD_1003_2010               | 88.568                                  | 88.508                                  | 88.568                                 | 88.568                                                  | 88.508                              |
| XII.1_XII_a_KU594618_chicken_Peru_Arequipa_VFAR_81_2015     | 87.064                                  | 87.004                                  | 87.064                                 | 87.064                                                  | 87.004                              |
| XII.1_XII_a_KU594615_chicken_Peru_Apurimac_50009_2005       | 88.448                                  | 88.147                                  | 88.448                                 | 88.448                                                  | 88.147                              |
| XII.1_XII_a_KU594616_gamecock_Peru_Lurin_40871_2004         | 88.448                                  | 88.147                                  | 88.448                                 | 88.448                                                  | 88.147                              |

|                                                                             |        |        |        |        |        |
|-----------------------------------------------------------------------------|--------|--------|--------|--------|--------|
| XVIII.1_XVIII_a_JX518885_chicken_Mali_ML57051T_2010                         | 88.387 | 88.568 | 88.387 | 88.387 | 88.568 |
| XVIII.1_XVIII_a_FJ772455_Mauritania_1532_14_2006                            | 88.628 | 88.809 | 88.628 | 88.628 | 88.809 |
| XVIII.1_XVIII_a_JF966389_guinea_fowl_Mali_ML038_2007                        | 88.207 | 88.387 | 88.207 | 88.207 | 88.387 |
| XVIII.2_XVIII_b_JX518886_chicken_Mali_ML57072T_2010                         | 89.29  | 88.748 | 89.29  | 89.29  | 88.748 |
| XVIII.2_XVIII_b_HF969218_chicken_Ivory_Coast_CIV08_42_2007                  | 88.869 | 88.688 | 88.869 | 88.869 | 88.688 |
| XVIII.2_XVIII_b_HG326600_village_weaver_Ivory_Coast_CIV08_32_2006           | 89.11  | 88.929 | 89.11  | 89.11  | 88.929 |
| XIII.2.2_XIII_b_KM056349_chicken_India_ndv42_gopalpura_4_2013               | 87.304 | 87.124 | 87.304 | 87.304 | 87.124 |
| XIII.1.1_XIII_a_JN942043_roller_Tanzania_47385_11_2010                      | 87.485 | 87.605 | 87.485 | 87.485 | 87.605 |
| XIII.1.1_XIII_a_MF409241_chicken_Zambia_Chiwoko_2015                        | 88.508 | 88.688 | 88.508 | 88.508 | 88.688 |
| XIII.1.1_XIII_a_JN942034_ostrich_South_Africa_45445_3_1995                  | 89.651 | 89.591 | 89.651 | 89.651 | 89.591 |
| XIII.1.2_XIII_a_JQ267584_chicken_Iran_EMM_2_2008                            | 89.35  | 89.29  | 89.35  | 89.35  | 89.29  |
| XIII.1.2_XIII_a_JQ267579_chicken_Iran_EMM_7_2011                            | 89.23  | 89.29  | 89.23  | 89.23  | 89.29  |
| XIII.1.2_XIII_a_JQ267585_chicken_Iran_EMM_1_2008                            | 89.11  | 89.17  | 89.11  | 89.11  | 89.17  |
| XIII.2.2_XIII_b_KT734767_chicken_India_Polashbari_2014                      | 88.147 | 88.267 | 88.147 | 88.147 | 88.267 |
| XIII.2.2_XIII_b_KX372707_chicken_India_Nagpur_3_2011                        | 87.244 | 87.244 | 87.244 | 87.244 | 87.244 |
| XIII.2.1_XIII_b_GU182323_chicken_Pakistan_SPVC_Karachi_43_2008              | 87.545 | 87.726 | 87.545 | 87.545 | 87.726 |
| XIII.2.1_XIII_b_GU182331_chicken_Pakistan_SPVC_Karachi_33_2007              | 88.327 | 88.387 | 88.327 | 88.327 | 88.387 |
| XIII.2.1_XIII_b_KF113338_chicken_Pakistan_University_Diagnostic_Lab_12_2010 | 88.207 | 88.387 | 88.207 | 88.207 | 88.387 |
| VII.2_VII_h_MF622047_chicken_South_Africa_RBWW_3_2013                       | 89.17  | 88.989 | 89.17  | 89.17  | 88.989 |
| VII.2_VII_i_KU862293_Parakeet_Pakistan_Karachi_AW_1_2014                    | 90.554 | 90.193 | 90.554 | 90.554 | 90.193 |
| VII.2_VII_i_HQ697254_chicken_Indonesia_Banjarmasin_10_2010                  | 90.854 | 90.493 | 90.854 | 90.854 | 90.493 |
| VII.1.2_VII_f_DQ227246_goose_China_Jiangsu_JS02_1999                        | 92.96  | 92.78  | 92.96  | 92.96  | 92.78  |
| VII.1.2_VII_f_AY028995_fowl_China_A7_1996                                   | 93.081 | 92.9   | 93.081 | 93.081 | 92.9   |
| VII.1.2_VII_f_GQ338309_pigeon_China_18_2003                                 | 93.562 | 93.381 | 93.562 | 93.562 | 93.381 |
| VII.1.1_VII_l_KX268351_chicken_Iran_Behshahr_2015                           | 93.682 | 93.201 | 93.682 | 93.682 | 93.201 |
| VII.1.1_VII_j_KC542905_chicken_China_Liaoning_1_2009_2009                   | 98.075 | 97.894 | 98.075 | 98.075 | 97.894 |
| VII.1.1_VII_e_AB853927_chicken_Japan_Ibaraki_SG106_1999                     | 94.344 | 93.923 | 94.344 | 94.344 | 93.923 |
| VII.1.1_VII_b_EF589133_pheasant_China_98_Guizhou_1998                       | 95.307 | 95.247 | 95.307 | 95.307 | 95.247 |
| VII.1.1_VII_d_EF579733_chicken_China_Shandong_Pyan_2004                     | 94.344 | 94.043 | 94.344 | 94.344 | 94.043 |
| VII.2_VII_k_KY747479_chicken_Namibia_5620_2016                              | 89.29  | 89.11  | 89.29  | 89.29  | 89.11  |
| VII.2_VII_a_JN986837_chicken_Netherlands_152608_ancestral_1993              | 91.937 | 91.637 | 91.937 | 91.937 | 91.637 |
| XI_XI_HQ266602_chicken_Madagascar_MG_725_2008                               | 82.07  | 81.889 | 82.07  | 82.07  | 81.889 |
| XI_XI_JX518882_chicken_Madagascar_MGMNJ_2009                                | 81.408 | 81.227 | 81.408 | 81.408 | 81.227 |
| XI_XI_JX518884_chicken_Madagascar_MGS1595T_2011                             | 81.889 | 81.829 | 81.889 | 81.889 | 81.829 |
| II_II_GU978777_chicken_USA_TX_GB_1948                                       | 82.912 | 83.032 | 82.912 | 82.912 | 83.032 |
| II_II_AF077761_chicken_USA_Lasota_1946                                      | 82.912 | 83.032 | 82.912 | 82.912 | 83.032 |
| II_II_JN872151_chicken_USA_Hitchner_B1_1947                                 | 83.032 | 83.153 | 83.032 | 83.032 | 83.153 |
| XXI_VI_l_KC205479_chicken_Ethiopia_ETHMG1C_2011                             | 85.68  | 85.319 | 85.68  | 85.68  | 85.319 |
| X.1_X_a_FJ705468_mottled_duck_USA_TX_130_2011                               | 84.271 | 83.848 | 84.271 | 84.271 | 83.848 |
| X.1_X_a_KX857716_Redhead_USA_ndv42_AI09_4117_2009                           | 84.055 | 83.634 | 84.055 | 84.055 | 83.634 |
| X.2_X_b_FJ705466_mallard_99_376_1999                                        | 84.15  | 84.15  | 84.15  | 84.15  | 84.15  |
| X.2_X_b_KX857721_Mallard_USA_MN_AI10_3434_2010                              | 83.755 | 83.755 | 83.755 | 83.755 | 83.755 |

|                                                                   |        |        |        |        |        |
|-------------------------------------------------------------------|--------|--------|--------|--------|--------|
| V.1_V_b_JN872194_chicken_Honduras_498109_15_2007                  | 84.717 | 84.717 | 84.717 | 84.717 | 84.717 |
| V.1_V_b_JN942027_fighting_cock_Nicaragua_95066_9_2001             | 85.499 | 85.86  | 85.499 | 85.499 | 85.86  |
| V.1_V_b_JN872189_parrot_USA_Coast_8278_1982                       | 86.763 | 86.763 | 86.763 | 86.763 | 86.763 |
| V.2_V_c_JQ697744_chicken_Mexico_NC04_635_2010                     | 87.417 | 87.477 | 87.417 | 87.417 | 87.477 |
| V.2_V_c_EU518682_Dove_Mexico_Distrito_Federal_462_2004            | 87.665 | 87.605 | 87.665 | 87.665 | 87.605 |
| V.2_V_c_EU518684_chicken_Mexico_Estado_de_Mexico_466_2006         | 87.365 | 87.425 | 87.365 | 87.365 | 87.425 |
| XIX_V_a_FJ705456_cormorant_USA_MN_92_40140_1992                   | 85.723 | 85.723 | 85.723 | 85.723 | 85.723 |
| XIX_V_a_JN942024_cormorant_USA_WI_272409_2003                     | 86.161 | 85.68  | 86.161 | 86.161 | 85.68  |
| XIX_V_a_KC433530_cormorant_USA_FL_41105_2012                      | 85.379 | 85.259 | 85.379 | 85.379 | 85.259 |
| XXI.2_VI_i_KU377535_Turtle_dove_Italy_12VIR1876_1_2012            | 85.86  | 85.56  | 85.86  | 85.86  | 85.56  |
| XXI.2_VI_i_JN638234_dove_Italy_11RS98_102VIR_2011                 | 85.8   | 85.379 | 85.8   | 85.8   | 85.379 |
| XXI.2_VI_i_KU377533_Turtle_dove_Italy_10VIR7155_2010              | 85.74  | 85.319 | 85.74  | 85.74  | 85.319 |
| XVI_XVI_JX915242_chicken_Dominican_Republic_28138_4_1986          | 85.018 | 85.018 | 85.018 | 85.018 | 85.018 |
| XVI_XVI_JX186997_chicken_Dominican_Republic_867_2008              | 83.694 | 84.055 | 83.694 | 83.694 | 84.055 |
| I.2_I_b_KC503453_American_green_winged_teal_USA_AK_44493_716_2009 | 84.176 | 84.116 | 84.176 | 84.176 | 84.116 |
| I.2_I_b_AY965079_duck_Russia_FarEast_2713_2001                    | 84.717 | 84.777 | 84.717 | 84.717 | 84.777 |
| I.2_I_b_HG326605_spur_winged_goose_Nigeria_NIE08_121_2008         | 84.416 | 84.416 | 84.416 | 84.416 | 84.416 |
| I.1.1_I_a_M24693_chicken_Australia_Queensland_1966                | 85.078 | 84.958 | 85.078 | 85.078 | 84.958 |
| I.1.1_I_a_AY935490_chicken_Australia_2_1334_2002                  | 85.078 | 84.898 | 85.078 | 85.078 | 84.898 |
| I.1.1_I_a_AY935495_chicken_Australia_99_868_hi_1999               | 85.439 | 85.199 | 85.439 | 85.439 | 85.199 |
| I.1.2.2_I_d_KC503476_northern_pintail_USA_AK_44500_136_2009       | 84.116 | 83.875 | 84.116 | 84.116 | 83.875 |
| I.1.2.2_I_d_AB465607_chicken_Japan_Ishi_1962                      | 85.018 | 84.958 | 85.018 | 85.018 | 84.958 |
| I.1.2.2_I_d_KC503479_redpoll_Russia_Nikita_530_FFNK2_2008         | 83.935 | 83.815 | 83.935 | 83.935 | 83.815 |
| I.1.2.1_I_c_KX352834_gull_Russia_Tyva_14_2014                     | 82.671 | 82.732 | 82.671 | 82.671 | 82.732 |
| I.1.2.1_I_c_EF564816_redknot_USA_NJ_A_101_1383_2001               | 83.273 | 83.454 | 83.273 | 83.273 | 83.454 |
| I.1.2.1_I_c_GQ918280_black_headed_gull_Sweden_1994                | 84.176 | 84.296 | 84.176 | 84.176 | 84.296 |
| XXI.1.2_VI_m_KY042141_Pigeon_Pakistan_Jallo_Lahore_221B_2016      | 86.161 | 86.522 | 86.161 | 86.161 | 86.522 |
| XXI.1.2_VI_m_KU862298_pigeon_Pakistan_Lahore_AW_2_2015            | 86.221 | 86.522 | 86.221 | 86.221 | 86.522 |
| XXI.1.2_VI_m_KY042135_Pigeon_Pakistan_22A_2015                    | 86.643 | 87.064 | 86.643 | 86.643 | 87.064 |
| III_III_GU182327_chicken_Pakistan_SPVC_Karachi_1_1974             | 84.838 | 84.958 | 84.838 | 84.838 | 84.958 |
| III_III_EF201805_avian_Mukteswar_1940                             | 85.078 | 85.199 | 85.078 | 85.078 | 85.199 |
| III_III_MH996904_pigeon_Bulgaria_Novo_Selo_1161_1995              | 85.018 | 85.138 | 85.018 | 85.018 | 85.138 |
| XXI.1.1_VI_g_KY042136_Pigeon_Pakistan_Lahore_125_2015             | 88.267 | 88.267 | 88.267 | 88.267 | 88.267 |
| XXI.1.1_VI_g_JF824032_pigeon_Russia_Vladimir_687_2005             | 88.207 | 87.906 | 88.207 | 88.207 | 87.906 |
| XXI.1.1_VI_g_KY042132_Pigeon_Egypt_73_OP_G29_2015                 | 88.026 | 87.846 | 88.026 | 88.026 | 87.846 |
| XX_VI_c_KY042142_quail_Korea_88_M_1988                            | 88.267 | 88.207 | 88.267 | 88.267 | 88.207 |
| XX_VI_c_AB853928_chicken_Japan_Ibaraki_SM87_1987                  | 88.387 | 88.327 | 88.387 | 88.387 | 88.327 |
| XX_VI_c_AF458016_chicken_China_ZhJ_2_1986                         | 88.573 | 88.513 | 88.573 | 88.573 | 88.513 |
| VI.2.1.2_VI_h_HG424627_pigeon_Nigeria_NIE13_92_2013               | 87.545 | 87.605 | 87.545 | 87.545 | 87.605 |
| VI.2.2.2_VI_e_FJ480825_pigeon_China_PG_JS_1_2005                  | 87.545 | 87.665 | 87.545 | 87.545 | 87.665 |
| VI.2.2.2_VI_e_JX244794_pigeon_China_100_2008                      | 87.966 | 88.087 | 87.966 | 87.966 | 88.087 |
| VI.2.2.2_VI_e_KJ607163_pigeon_China_LJS_1_2004                    | 87.846 | 87.846 | 87.846 | 87.846 | 87.846 |

|                                                                 |        |        |        |        |        |
|-----------------------------------------------------------------|--------|--------|--------|--------|--------|
| VI.1_VI_b_AF109885_domestic_fowl_Great_Britain_GB1168_1984      | 88.508 | 88.568 | 88.508 | 88.508 | 88.568 |
| VI.1_VI_b_FJ410145_pigeon_USA_NY_1984                           | 88.448 | 88.387 | 88.448 | 88.448 | 88.387 |
| VI.1_VI_b_FJ865434_pigeon_China_S_1_2002                        | 88.267 | 88.327 | 88.267 | 88.267 | 88.327 |
| VI.2.2.1_VI_f_JN872180_waterfowl_USA_TX_209682_2002             | 87.665 | 87.846 | 87.665 | 87.665 | 87.846 |
| VI.2.2.1_VI_f_JN872182_pigeon_USA_12339_1998                    | 87.605 | 87.545 | 87.605 | 87.605 | 87.545 |
| VI.2.2.1_VI_f_JX901312_pigeon_USA_101_2001                      | 87.485 | 87.184 | 87.485 | 87.485 | 87.184 |
| VI.2.1.2_VI_h_HG326604_pigeon_Nigeria_NIE09_1898_2009           | 87.665 | 87.485 | 87.665 | 87.665 | 87.485 |
| VI.2.1.2_VI_h_JX518532_laughing_dove_Kenya_B2_Isiolo_2012       | 87.786 | 87.244 | 87.786 | 87.786 | 87.244 |
| VI.2.1.1.1_VI_n_MG018211_ECDO_USA_TX_1185_kidney_26981_3_A_2015 | 86.522 | 86.402 | 86.522 | 86.522 | 86.402 |
| VI.2.1.1.1_VI_a_JX901367_pigeon_USA_PA_810_2008                 | 87.545 | 87.726 | 87.545 | 87.545 | 87.726 |
| VI.2.1.1.1_VI_a_JX901351_pigeon_USA_NJ_721_2007                 | 87.726 | 87.786 | 87.726 | 87.726 | 87.786 |
| VI.2.1.1.2.2_VI_k_MG840654.1_pigeon_China_Ningxia_2068_2016     | 86.101 | 86.041 | 86.101 | 86.101 | 86.041 |
| VI.2.1.1.2.2_VI_k_KT163262_pigeon_China_SH_167_2013             | 86.643 | 86.582 | 86.643 | 86.643 | 86.582 |
| VI.2.1.1.2.2_VI_k_JX901124_pigeon_Belgium_11_09620_2011         | 86.883 | 86.823 | 86.883 | 86.883 | 86.823 |
| VI.2.1.1.2.1_VI_j_JX094510_pigeon_China_sms12_2012              | 87.064 | 87.064 | 87.064 | 87.064 | 87.064 |
| VI.2.1.1.2.1_VI_j_JX901110_pigeon_Belgium_248_1998              | 88.327 | 88.387 | 88.327 | 88.327 | 88.387 |
| VI.2.1.1.2.1_VI_j_JX486553_pigeon_China_LHLJ_110813_2011        | 87.906 | 87.726 | 87.906 | 87.906 | 87.726 |
| IX_IX_AF458009_chicken_China_FJ_1_1985                          | 85.732 | 85.973 | 85.732 | 85.732 | 85.973 |
| IX_IX_FJ436303_chicken_China_ZJ_1_1986                          | 85.62  | 85.74  | 85.62  | 85.62  | 85.74  |
| IX_IX_FJ436302_chicken_China_F48E8_1948                         | 85.68  | 85.8   | 85.68  | 85.68  | 85.8   |
| IV_IV_AY741404_Fowl_UK_Herts_1933                               | 87.425 | 87.425 | 87.425 | 87.425 | 87.425 |
| IV_IV_MH996900_pullet_Bulgaria_Plovdiv_1153_1959                | 86.703 | 86.342 | 86.703 | 86.703 | 86.342 |
| VIII_VIII_FJ751918_chicken_China_QH1_1979                       | 87.485 | 87.665 | 87.485 | 87.485 | 87.665 |
| XVI_XVI_JX915243_chicken_Mexico_Queretaro_452_1947_1947         | 88.628 | 88.929 | 88.628 | 88.628 | 88.929 |
| VIII_VIII_AY734534_chicken_Argentina_Trenque_Lauquen_1970       | 88.267 | 88.508 | 88.267 | 88.267 | 88.508 |
| VIII_VIII_JX012096_Malaysia_AF2240_1960                         | 88.748 | 88.929 | 88.748 | 88.748 | 88.929 |

**Supplementary Table S2.** The genetic relatedness among the NDV isolates sequenced in this study. Phylogenetic analysis was done based on full genome sequence. Sequence similarities are represented as pairwise percentages, coloured from white to green for genetic dissimilarity to similarity.

|                                                      | NDV/Chicken/Egypt/ALEX/ZU-NM97/2019 | NDV/Black-crowned night heron/Egypt/POR/ZU-NM85/2019 | NDV/Duck/Egypt/DAK/ZU-NM09/2019 | NDV/Chicken/Egypt/NOR/ZU-NM76/2019 | NDV/Chicken/Egypt/ALEX/ZU-NM99/2019 |
|------------------------------------------------------|-------------------------------------|------------------------------------------------------|---------------------------------|------------------------------------|-------------------------------------|
| NDV/Chicken/Egypt/ALEX/ZU-NM97/2019                  |                                     | 94.147                                               | 97.035                          | 96.85                              | 97.096                              |
| NDV/Black-crowned night heron/Egypt/POR/ZU-NM85/2019 | 94.147                              |                                                      | 94.481                          | 95.628                             | 96.194                              |
| NDV/Duck/Egypt/DAK/ZU-NM09/2019                      | 97.035                              | 94.481                                               |                                 | 96.873                             | 97.182                              |
| NDV/Chicken/Egypt/NOR/ZU-NM76/2019                   | 96.85                               | 95.628                                               | 96.873                          |                                    | 98.627                              |
| NDV/Chicken/Egypt/ALEX/ZU-NM99/2019                  | 97.096                              | 96.194                                               | 97.182                          | 98.627                             |                                     |

**Supplementary Table S3.** Genetic similarity of closely branched strains from phylogenetic analysis of the fusion (F) protein gene from **Supplementary Figure S3**. Pairwise comparisons shown as percentage similarity of the open-reading frame.

|                                              | Egypt_76_chicken_2019 | Egypt_85_night_heron_2019 | Egypt_9_domestic_duck_2019 | Egypt_97_chicken_2019 | Egypt_99_chicken_2019 |
|----------------------------------------------|-----------------------|---------------------------|----------------------------|-----------------------|-----------------------|
| KY510687.1_NDV/chicken/IS/2/2017             | 98.014                | 98.014                    | 97.954                     | 97.954                | 98.014                |
| JQ015297.1_NDV/chicken/China/SDYT03/2011     | 98.014                | 98.014                    | 97.954                     | 97.954                | 98.014                |
| KU365650.1_NDV-FU4-EGYPT-NLQP-2014           | 98.255                | 98.255                    | 98.195                     | 98.195                | 98.255                |
| KU365653.1_NDV-FU5-EGYPT-NLQP-2014           | 97.834                | 97.834                    | 97.894                     | 97.894                | 97.834                |
| KY075892.1_NDV/chicken/Egypt/Ismailia29/2016 | 98.315                | 98.315                    | 99.458                     | 99.458                | 98.315                |
| KY075888.1_NDV/chicken/Egypt/EI-Arish16/2016 | 98.616                | 98.616                    | 98.436                     | 98.436                | 98.616                |

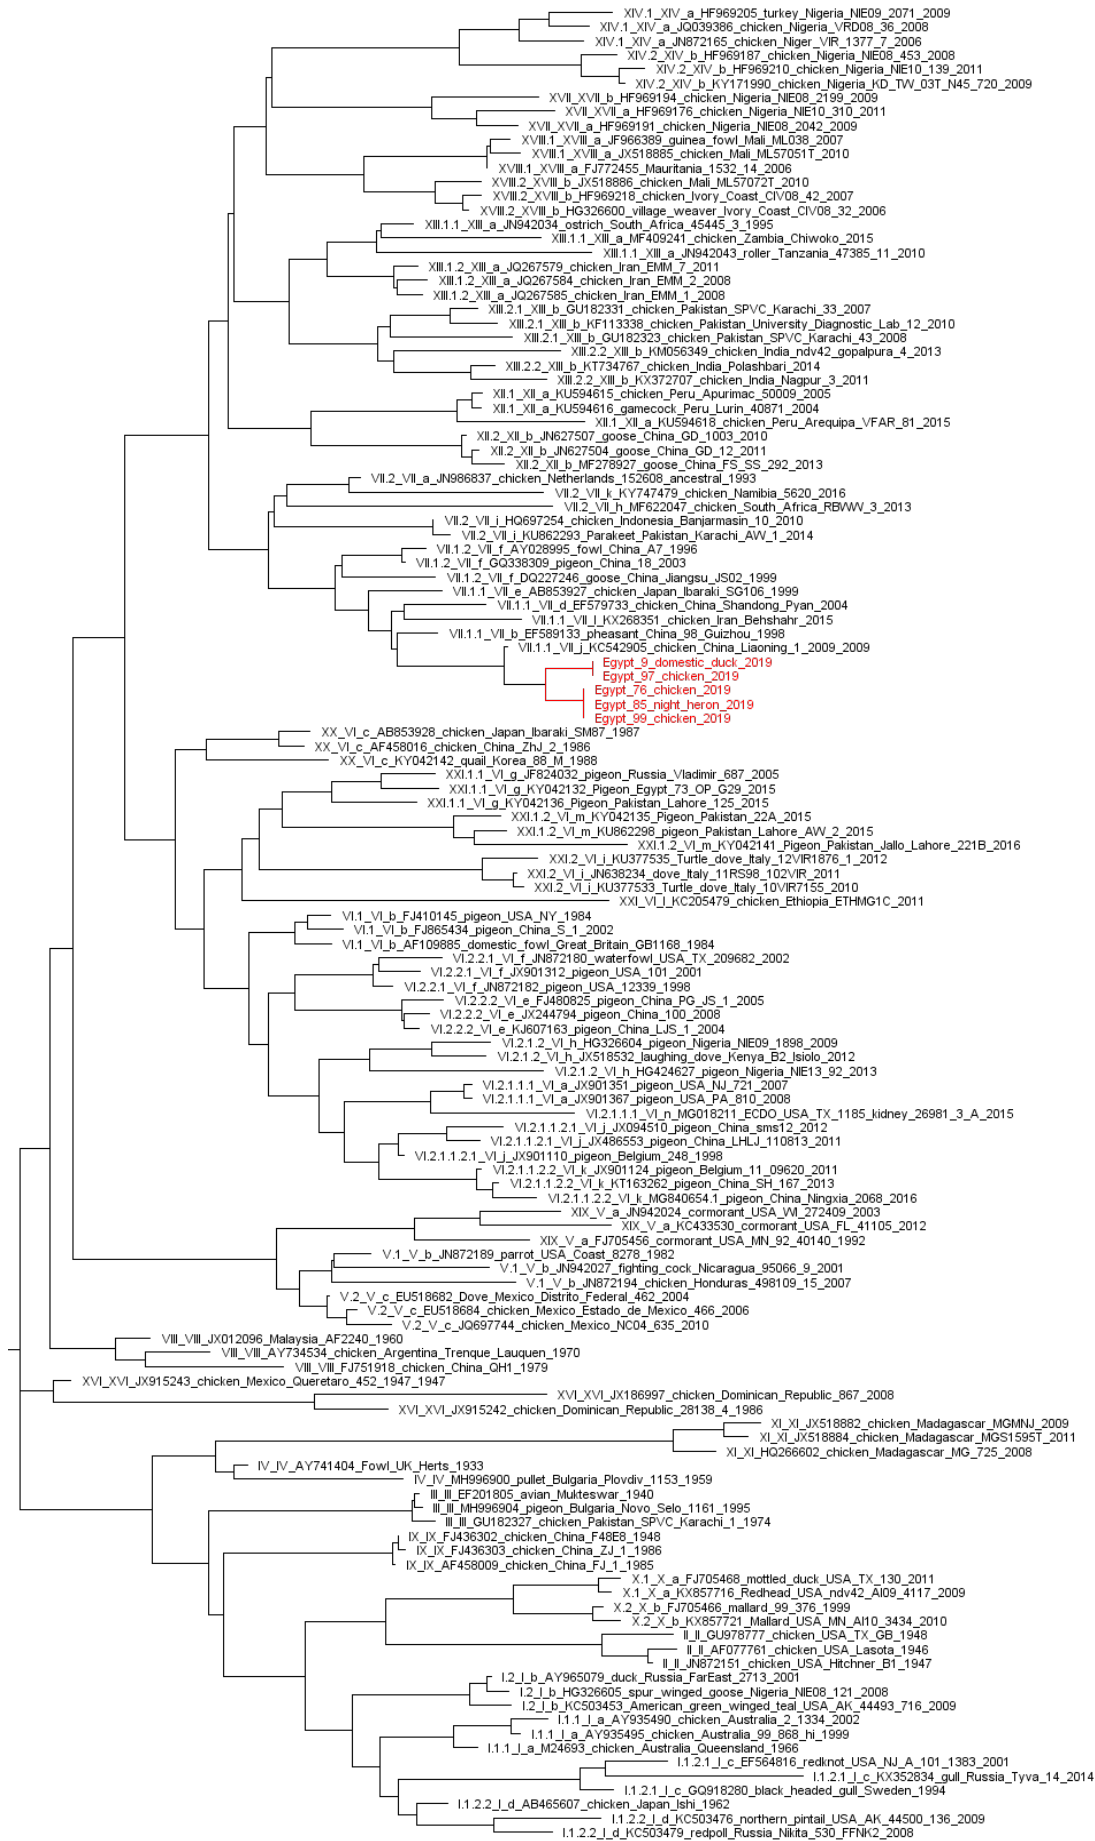

0.02

**Supplementary Figure S1.** A maximum-likelihood phylogenetic tree of the full fusion, F gene sequences of members of the Class II Newcastle disease virus strains. The analysis involved 130 nucleotide sequences created by an international consortium of NDV experts for the needs of objective classification of NDV isolates (Dymitrov et al, 2019). Five samples sequenced in this study (red) clustered with China, Liaoning 2009, a group VII strain. GTR nucleotide substitution model, with among-site rate variation modelled using a discrete gamma distribution was performed to generate evolutionary history. Evolutionary analyses were conducted in MEGA11.

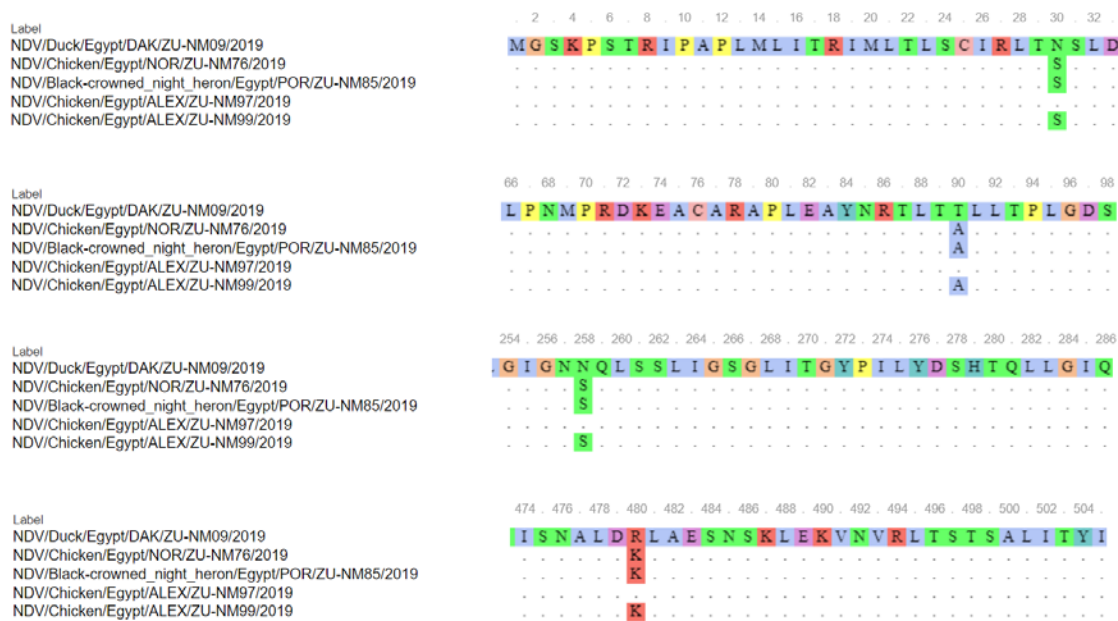

**Supplementary Figure S2.** Multiple sequence alignment of fusion protein (F) of Newcastle disease virus (NDV) strains sequenced in this study. Differences in amino acid compositions between the NDV strains are highlighted with position number listed above. Amino acids are



coloured by default using RasMol 'amino' colour scheme according to traditional amino acid properties. Identical amino acids are indicated by a ( . ).

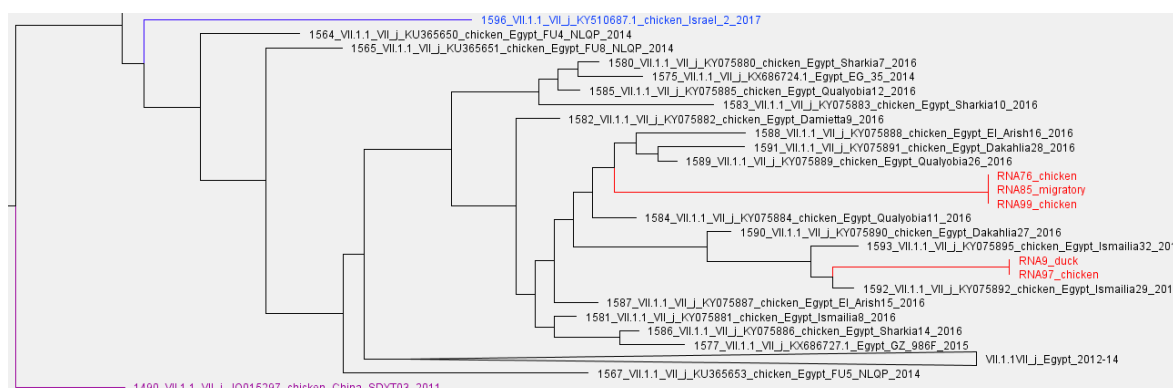

**Supplementary Figure S3.** Phylogenetic tree of the nucleotide sequences of the fusion (F) protein gene of Newcastle disease virus strains representing the genotype VII subgroup viruses ( $n=559$ ). The evolutionary history was generated using GTR nucleotide substitution model, with among-site rate variation modelled using a discrete gamma distribution and 500 bootstrap replicate tests. The analysis involved 559 nucleotide sequences, including five F gene sequences in this study (red). Closely related strains outside of the Egyptian strains are an Israeli strain (blue) and a Chinese strain (purple). Visualised and edited in FigTree.
